# Supplementary material for: Esterification of fluorinated aromatic carboxylic acids with methanol by using UiO-66-NH2 as a heterogeneous catalyst and process optimization by the Taguchi method
Source: Royal Society of Chemistry journal article supplement (doi:10.1039/d3ra02005c), 2023-01-01
Supplement: d3ra02005c1.pdf [file d3ra02005c1.pdf]

**Table S1: All the compounds with their abbreviations and retention times (RT), SIM ions**

| S.No. | Compound full name                | Abbreviation      | RT(k-factor=2.93) | SIM Ions |
|-------|-----------------------------------|-------------------|-------------------|----------|
| 1     | 2-Fluorobenzoic acid              | 2-FBA             | 15.82             | 95,123   |
| 2     | 3- Fluorobenzoic acid             | 3-FBA             | 14.74             | 95,123   |
| 3     | 4- Fluorobenzoic acid             | 4-FBA             | 14.74             | 95,123   |
| 4     | 2,3- di Fluorobenzoic acid        | 2,3- DFBA         | 15.66             | 113, 141 |
| 5     | 2,4- di Fluorobenzoic acid        | 2,4- DFBA         | 14.57             | 113, 141 |
| 6     | 2,5- di Fluorobenzoic acid        | 2,5- DFBA         | 15.03             | 113, 141 |
| 7     | 2,6- di Fluorobenzoic acid        | 2,6- DFBA         | 15.00             | 113, 141 |
| 8     | 3,4- di Fluorobenzoic acid        | 3,4- DFBA         | 14.46             | 113, 141 |
| 9     | 3,5- di Fluorobenzoic acid        | 3,5-DFBA          | 13.31             | 113, 141 |
| 10    | 2,3,4- tri Fluorobenzoic acid     | 2,3,4- TFBA       | 14.81             | 131, 159 |
| 11    | 2,3,5- tri Fluorobenzoic acid     | 2,3,5- TFBA       | 13.97             | 131, 159 |
| 12    | 2,3,6- tri Fluorobenzoic acid     | 2,3,6- TFBA       | 14.56             | 131, 159 |
| 13    | 2,4,5- tri Fluorobenzoic acid     | 2,4,5- TFBA       | 14.02             | 131, 159 |
| 14    | 2,4,6- tri Fluorobenzoic acid     | 2,4,6- TFBA       | 13.13             | 131, 159 |
| 15    | 3,4,5- tri Fluorobenzoic acid     | 3,4,5-TFBA        | 13.38             | 131, 159 |
| 16    | 2,3,4,5- tetra Fluorobenzoic acid | 2,3,4,5- TetraFBA | 13.39             | 149, 177 |
| 17    | 2,3,5,6- tetra Fluorobenzoic acid | 2,3,5,6-TetraFBA  | 13.23             | 149, 177 |

|    |                                           |                |       |          |
|----|-------------------------------------------|----------------|-------|----------|
| 18 | 2,3,4,5,6-penta<br>Fluorobenzoic acid     | 2,3,4,5,6-PFBA | 12.17 | 167,195  |
| 19 | 2,6-Bis (Trifluoromethyl)<br>benzoic acid | 2,6-Bis FBA    | 14.53 | 213, 241 |
| 20 | 3,5-Bis (Trifluoromethyl)<br>benzoic acid | 3,5-Bis FBA    | 13.01 | 213, 241 |
| 21 | 2-(Trifluoromethyl)<br>benzoic acid       | 2-TFM          | 15.44 | 145,173  |
| 22 | 4-(Trifluoromethyl)<br>benzoic acid       | 4-TFM          | 14.75 | 145,173  |
| 23 | 3-(Trifluoromethyl)<br>benzoic acid       | 3-TFM          | 15.02 | 145,173  |

**Table S2 - Regression equation for different substituted FBAs**

| Type of<br>FBA | Regression equation                                                                                                                                                                                                                                                                                                                                                                                                                   | Value of<br>R <sup>2</sup> (%) |
|----------------|---------------------------------------------------------------------------------------------------------------------------------------------------------------------------------------------------------------------------------------------------------------------------------------------------------------------------------------------------------------------------------------------------------------------------------------|--------------------------------|
| Mono<br>FBA    | Response = -20853896 - 1661757 SV + 197169 W - 1891474 t + 409936 Temp + 13602417 VH + 1178061 SV <sup>2</sup> + 89018 t <sup>2</sup> - 680 Temp <sup>2</sup> + 4875387 VH <sup>2</sup> + 6740 SV*W + 522765 SV*t - 38001 SV*Temp - 5621688 SV*VH + 1959 W*t + 648.5 W*Temp - 78945 W*VH - 5668 t*Temp + 218202 t*VH - 292347 Temp*VH + 26684 SV*Temp*VH - 2218 t*Temp*VH + 1143.4 Temp <sup>2</sup> *VH - 22608 Temp*VH <sup>2</sup> | 99.99                          |
| Di-FBA         | Response = -3938150 - 313814 SV + 37234 W - 357195 t + 77414 Temp + 2568746 VH + 222471 SV <sup>2</sup> + 16811 t <sup>2</sup> - 128.3 Temp <sup>2</sup> + 920691 VH <sup>2</sup> + 1273 SV*W + 98721 SV*t - 7176 SV*Temp - 1061626 SV*VH + 370 W*t + 122.5 W*Temp - 14908 W*VH - 1070 t*Temp + 41206 t*VH - 55208 Temp*VH + 5039 SV*Temp*VH - 419.0 t*Temp*VH + 215.9 Temp <sup>2</sup> *VH - 4269 Temp*VH <sup>2</sup>              | 99.99                          |
| Tri-FBA        | Response = -8044897 - 215691 SV + 68477 W - 628723 t + 157441 Temp + 4910092 VH + 449641 SV <sup>2</sup> + 34991 t <sup>2</sup> - 230.6 Temp <sup>2</sup> + 1986187 VH <sup>2</sup> + 4952 SV*W + 194018 SV*t - 18397 SV*Temp - 2288602 SV*VH - 483 W*t + 168.5 W*Temp - 26302 W*VH - 3148 t*Temp + 57923 t*VH - 110182 Temp*VH + 11414 SV*Temp*VH - 533.6 t*Temp*VH + 434.75 Temp <sup>2</sup> *VH - 9634 Temp*VH <sup>2</sup>       | 100.00                         |
| Tetra-<br>FBA  | Response = -4546301 - 362275 SV + 42984 W - 412355 t + 89369 Temp + 2965426 VH + 256826 SV <sup>2</sup> + 19407 t <sup>2</sup> - 148.1 Temp <sup>2</sup> + 1062870 VH <sup>2</sup> + 1469 SV*W + 113966 SV*t - 8284 SV*Temp - 1225569 SV*VH + 427 W*t + 141.4 W*Temp - 17211 W*VH - 1236 t*Temp + 47570 t*VH - 63734 Temp*VH + 5817 SV*Temp*VH - 483.6 t*Temp*VH + 249.3 Temp <sup>2</sup> *VH - 4929 Temp*VH <sup>2</sup>            | 99.99                          |

|            |                                                                                                                                                                                                                                                                                                                                                                                                                            |       |
|------------|----------------------------------------------------------------------------------------------------------------------------------------------------------------------------------------------------------------------------------------------------------------------------------------------------------------------------------------------------------------------------------------------------------------------------|-------|
| Penta-FBA  | Response = -2738096 - 104152 SV + 34912 W - 230648 t + 59425 Temp + 1497034 VH + 118116 SV <sup>2</sup> + 9244 t <sup>2</sup> - 165.1 Temp <sup>2</sup> + 722201 VH <sup>2</sup> - 234 SV*W + 58225 SV*t - 3226 SV*Temp - 733716 SV*VH - 115 W*t + 28.7 W*Temp - 9784 W*VH - 301 t*Temp + 36496 t*VH - 39474 Temp*VH + 3349 SV*Temp*VH - 349.1 t*Temp*VH + 173.0 Temp <sup>2</sup> *VH - 3530 Temp*VH <sup>2</sup>         | 99.94 |
| TFM-BA     | Response = -4557289 - 363151 SV + 43088 W - 413352 t + 89585 Temp + 2972593 VH + 257447 SV <sup>2</sup> + 19453 t <sup>2</sup> - 148.5 Temp <sup>2</sup> + 1065439 VH <sup>2</sup> + 1473 SV*W + 114242 SV*t - 8304 SV*Temp - 1228531 SV*VH + 428 W*t + 141.7 W*Temp - 17252 W*VH - 1239 t*Temp + 47685 t*VH - 63888 Temp*VH + 5831 SV*Temp*VH - 484.8 t*Temp*VH + 249.9 Temp <sup>2</sup> *VH - 4941 Temp*VH <sup>2</sup> | 99.99 |
| Bis-TFM-BA | Response = -2602706 - 207399 SV + 24608 W - 236069 t + 51163 Temp + 1697674 VH + 147030 SV <sup>2</sup> + 11110 t <sup>2</sup> - 84.8 Temp <sup>2</sup> + 608482 VH <sup>2</sup> + 841 SV*W + 65245 SV*t - 4743 SV*Temp - 701625 SV*VH + 244 W*t + 80.9 W*Temp - 9853 W*VH - 707 t*Temp + 27233 t*VH - 36487 Temp*VH + 3330 SV*Temp*VH - 276.9 t*Temp*VH + 142.70 Temp <sup>2</sup> *VH - 2822 Temp*VH <sup>2</sup>        | 99.99 |

Where SV = sample volume, W = weight of MOF, t = reaction time, VH = volume of hexane, T = temperature

**Table S3: Side products of the reaction with their confirmation probability in NIST library search.**

| S.No. | Compound name                       | % Confirmation probability |
|-------|-------------------------------------|----------------------------|
| 1     | 1,1,3 trimethoxy propane            | 45.73                      |
| 2     | 2,3,4, tri-FBA methyl phenyl ester  | 9.10                       |
| 3     | 2,3,4 tri-FBA difluoro phenyl ester | 6.25                       |
| 4     | 2-fluorobenzohydrazide              | 20.87                      |
| 5     | Methyl styrene                      | 14.67                      |
| 6     | Acetophenone                        | 15.46                      |
| 7     | Benzene, (1-methoxy-1-methylethyl)  | 53.38                      |
| 8     | Benzoic acid 2-fluoro ethyl ester   | 34.41                      |

**Table S4: GC-MS results of the five repeated cycles**

| No of cycles | % RC -1 | % RC -2 |
|--------------|---------|---------|
| 1            | 149.26  | 149.85  |
| 2            | 148.58  | 148.65  |
| 3            | 148.65  | 150.79  |
| 4            | 148.61  | 148.15  |
| 5            | 147.19  | 148.51  |

**A**

**B**

**C**

**D**

**E**

**F**

**G**

**H**

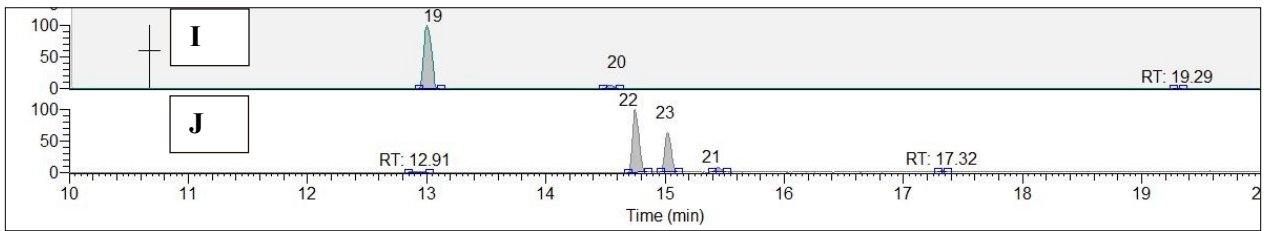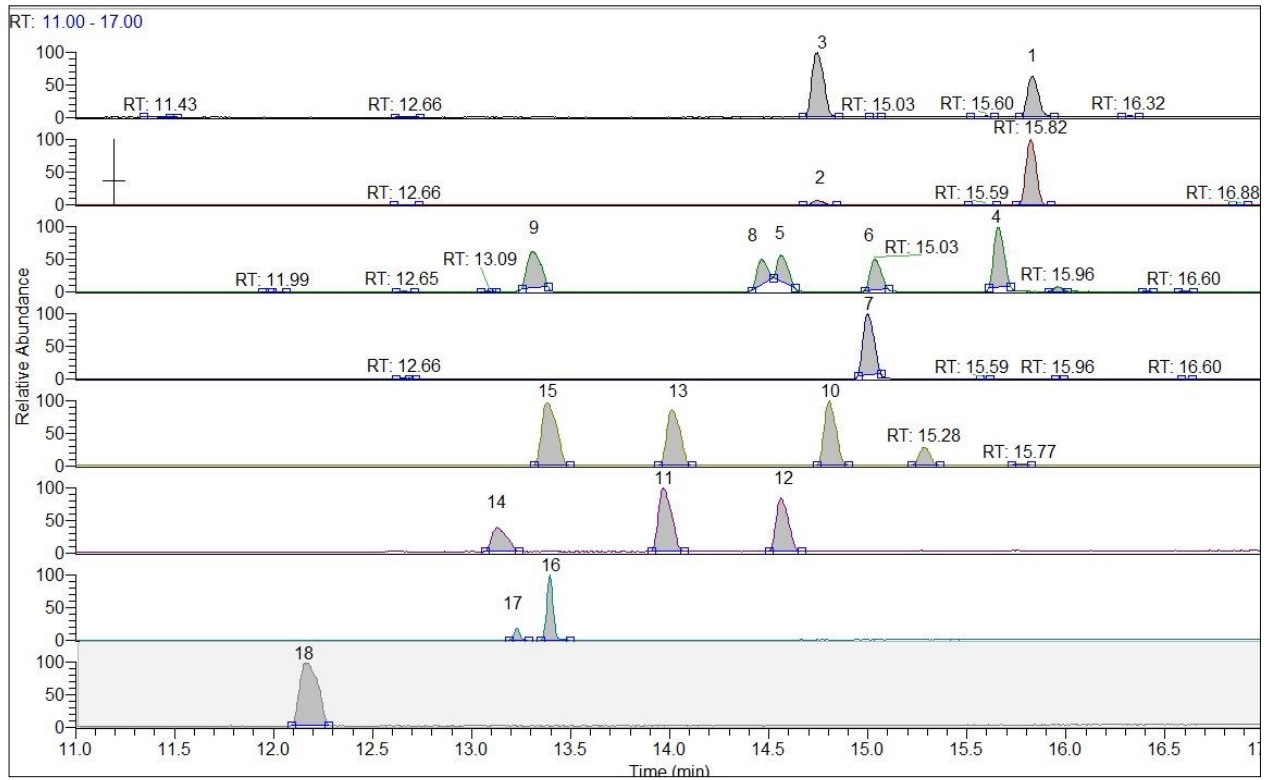

*Figure S1 - Chromatogram of (A) 2-FBA + 4-FBA, (B) 3-FBA, (C) Di-FBA mix without 2,6-DFBA, (D) 2,6 DFBA, (E) Mixture of 2,3,4 + 2,4,5 + 3,4,5 TFBA, (F) Mixture of 2,3,5 + 2,3,6 + 2,4,6 TFBA, (G) Mixture of Tetra-FBA, (H) Penta-FBA, (I) Mixture of Bis-FBAs, (J) Mixture of TFM-FBAs at their SIM ions (Peak numbering is done according to Table S1)*
